# Supplementary material
Source: MDPI journal article supplement (https://www.mdpi.com/2673-3943/2/3/31)
Supplement: s1 [file s1]

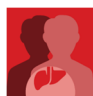

# Supplementary Materials: The Effects of 6-Chromanol SUL-138 during Hypothermic Machine Perfusion on Porcine Deceased Donor Kidneys

L. Annick van Furth <sup>1,\*</sup>, Leonie H. Venema <sup>1</sup>, Koen D.W. Hendriks <sup>1,2</sup>, Pieter C. Vogelaar <sup>2,3</sup>, Guido Krenning <sup>3,4</sup> and Henri G.D. Leuvenink <sup>1</sup>

<sup>1</sup> Department of Surgery, University Medical Centre Groningen, University of Groningen, 9726 Groningen, The Netherlands; l.h.venema@umcg.nl (L.H.V.); k.d.w.hendriks@umcg.nl (K.D.W.H.); h.g.d.leuvenink@umcg.nl (H.G.D.L.)

<sup>2</sup> Department of Clinical Pharmacy and Pharmacology, University Medical Centre Groningen, University of Groningen, 9726 Groningen, The Netherlands; p.c.vogelaar@umcg.nl

<sup>3</sup> Sulfateq B.V., 9726 Groningen, The Netherlands; g.krenning@umcg.nl

<sup>4</sup> Laboratory for Cardiovascular Regenerative Medicine, Department of Pathology and Medical Biology, University Medical Centre Groningen, University of Groningen, 9726 Groningen, The Netherlands

\* Correspondence: l.a.van.furth@umcg.nl; Tel.: +31-(6)-41638348

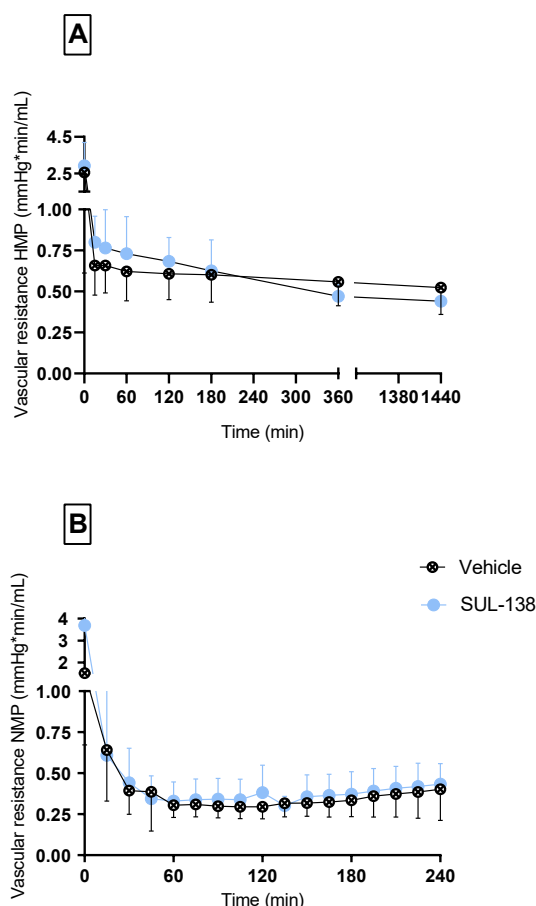

**Figure S1.** Vascular resistance during preservation and testing. Porcine kidneys were preserved with HMP with SUL-138 (●) and without the addition of SUL-138 (Vehicle ⊗) for 24 hours. (A) Vascular resistance during HMP, (B) Vascular resistance during normothermic functionality testing. HMP, hypothermic machine perfusion. The data are shown as mean±SD.
